1 **AI on animals: AI-assisted animal-borne logger never misses the moments that biologists want**

2

3 Authors: Joseph M. Korpela<sup>1</sup>, Hirokazu Suzuki<sup>2</sup>, Sakiko Matsumoto<sup>2</sup>, Yuichi Mizutani<sup>2</sup>, Masaki

4 Samejima<sup>1</sup>, Takuya Maekawa<sup>1\*</sup>, Junichi Nakai<sup>3</sup>, Ken Yoda<sup>2</sup>

5

6 **Affiliations**

7 <sup>1</sup>Graduate School of Information Science and Technology, Osaka University, Suita, Osaka 565-

8 0871, Japan

9 <sup>2</sup>Graduate School of Environmental Studies, Nagoya University, Nagoya, Aichi 464-8601, Japan

10 <sup>3</sup>Graduate School of Dentistry, Tohoku University, Sendai, Miyagi 980-8575, Japan

11 \*Correspondence: [maekawa@ist.osaka-u.ac.jp](mailto:maekawa@ist.osaka-u.ac.jp)

12

13

14 **ABSTRACT**

15 Animal-borne data loggers, i.e., biologgers, allow researchers to record a variety of sensor data  
16 from animals in their natural environments (Hussey et al. 2015; Kays et al. 2015). This data allows  
17 biologists to observe many aspects of the animals' lives, including their behavior, physiology, social  
18 interactions, and external environment. However, the need to limit the size of these devices to a  
19 small fraction of the animal's size imposes strict limits on the devices' hardware and battery  
20 capacities (Kays et al. 2015). Here we show how AI can be leveraged on board these devices to  
21 intelligently control their activation of costly sensors, e.g., video cameras, allowing them to make  
22 the most of their limited resources during long deployment periods. Our method goes beyond  
23 previous works that have proposed controlling such costly sensors using simple threshold-based  
24 triggers, e.g., depth-based (Watanuki et al. 2007; Volpov et al. 2015) and acceleration-based  
25 (Nishiumi et al. 2018; Brown et al. 2012) triggers. Using AI-assisted biologgers, biologists can  
26 focus their data collection on specific complex target behaviors such as foraging activities, allowing  
27 them to automatically record video that captures only the moments they want to see. By doing so,  
28 the biologger can reserve its battery power for recording only those target activities. We anticipate  
29 our work will provide motivation for more widespread adoption of AI techniques on biologgers,  
30 both for intelligent sensor control and intelligent onboard data processing. Such techniques can not  
31 only be used to control what is collected by such devices, but also what is transmitted off the  
32 devices, such as is done by satellite relay tags (Cox et al. 2018).

### 33 INTRODUCTION

34 ‘Bio-logging,’ i.e. the use of animal-borne sensors has revolutionized the study of animal behavior  
35 in the natural environments (Hussey et al. 2015; Kays et al. 2015). Although there have been  
36 extraordinary improvements in sensors and memories of the devices since the first logger was  
37 attached to a Weddell seal (Kooyman 1965), behavioral time-series data has been obtained with a  
38 simple strategy: continuous recording regardless of the researchers’ goals. For example, video  
39 loggers continue to shoot animal behavior and the surrounding environment including unimportant  
40 scenes, which consumes a large amount of power. Because the size of an animal-borne device is  
41 limited by the animal's carrying capacity, ‘intelligent’ technology is needed for increasing the  
42 potential to apply bio-logging in a variety of research fields.

43

44 In this study, we propose the concept of AI-assisted biologgers that use low-cost sensors to  
45 automatically detect activities of interest, allowing them to conditionally activate high-cost sensors  
46 to target those activities. Although simple threshold-based camera trigger mechanisms are available,  
47 e.g., acceleration-based GPS triggers (Brown et al. 2012), it is difficult for biologists to capture  
48 complex activities of interest with these mechanisms due to the difficulty in creating rules for  
49 detecting complex activities using only simple thresholding.

50

51 These costs can vary depending on the application, with examples including the use of low cost  
52 (low bitrate) GPS data to control a high cost (high bitrate) microphone that normally would quickly  
53 fill the device's storage, or the use of a low cost (low energy) acceleration sensor to control the use  
54 of a high-cost (energy consuming) camera. In this study, we focus on the second of these examples,  
55 using acceleration and GPS data to control the use of our logger's energy consuming camera

56 because biologists' demand for animal-borne video cameras keeps increasing for decades (e.g.,  
57 Rutz et al. 2007; Moll et al. 2007; Gómez-Laich et al. 2015).

58

59 Fig. 1 (a) shows an example of how such a logger can be used for seabirds, with the logger attached  
60 to the back of a seabird which is then released to roam freely in its natural environment. Fig. 1 (b)  
61 shows how this logger can continuously run its low-energy sensors (e.g., an accelerometer) and use  
62 these sensors' data to detect important activities, such as foraging. Upon detecting such important  
63 activities, the logger can then activate its energy consuming sensor (i.e., a camera) to record the  
64 important activity. By doing so, the logger can limit its use of the energy-consuming sensor to times  
65 when it is most likely to capture the target activity, increasing its chances for success by extending  
66 the runtime of the logger. This contrasts with normal loggers that continuously run the energy-  
67 consuming sensors, causing them to quickly exhaust their batteries which limits their chances for  
68 successfully recording the target activities.

69

70 In order to robustly detect animal activities using sensor data in the wild, we employ supervised  
71 learning to conduct activity recognition on board the logging devices. That is, we start by having a  
72 biologist label sensor data from low-energy sensors to identify the activities that he/she wants to  
73 record in advance. We then train an activity recognition model for detecting these activities using  
74 the labeled data and install the activity recognition model onto the loggers that are deployed in the  
75 field.

76

77 However, since the microcontroller units (MCUs) that can be mounted in small biologgers tend to  
78 have limited memory and low computing capability, it is difficult to run computationally expensive  
79 machine learning processes on the loggers. In this study, we have developed a computationally

80 efficient animal activity recognition method based on the random forest algorithm that can run on  
81 such MCUs. In brief, our method automatically builds a small decision tree for activity recognition  
82 that fits in the flash memory of the MCU while maintaining high activity recognition accuracy.

83

84 In addition, in order to achieve robust activity recognition, our method also has the following  
85 features: (i) robustness to noise, (ii) robustness to sensor positioning, and (iii) robustness to  
86 differences in sensor hardware. Robustness to noise refers to the need to handle the varying amount  
87 of noise present in sensor data due to differences in how securely the loggers are attached to the  
88 animals. Robustness to sensor positioning refers to the need to deal with differences in sensor data  
89 collected from different individuals due to variations in the positioning and orientation of the  
90 devices. Robustness to differences in sensor hardware refers to the need to handle the differences in  
91 sensor data that stem from using data collected from previous years' hardware when training  
92 models for a logger that uses new hardware. We discuss each of these features in the section *Sensor*  
93 *data logger*.

94

95 Along with the results reported in this paper, we are also providing open access to some of the  
96 software used in this study along with hardware diagrams of the biologgers used, in hopes of  
97 assisting other researchers who wish to deploy similar systems in the future. The software includes  
98 a labelling tool that can be used to prepare bilogger sensor data for use when training machine  
99 learning systems and a docker container that includes our algorithm for generating low cost decision  
100 trees and scripts for generating the source code needed to run biologgers such as the ones used in  
101 this study. This information is available at TBD.

102

103 **RESULTS**

## 104 **Sensor data logger**

105 We begin with a brief introduction to the sensor data loggers used in this study (for more details see  
106 Online Methods). Fig. 1 (c) shows a close-up view of the logger, with the camera module located on  
107 the far-left end of the logger. Fig. 1 (d) shows an example of the data collected from a chest-  
108 mounted logger, with the map displaying the GPS data collected and the two inset images showing  
109 frames from foraging activity captured by the device. Fig. 1 (e) shows an example of how these  
110 devices were attached in the field. In this example, the logger is attached on the back of the animal,  
111 with the camera facing forward and the GPS receiver (white square to the rear of the device) facing  
112 the sky. Additionally, in some cases the devices were instead attached to the chest of the birds, in  
113 order to improve the camera's field of view during foraging activities.

114

115 Note that because our logger is equipped with a commercially-available MCU and sensors using a  
116 simple circuit design (see Online Methods), we believe that reproduction of the logger system using  
117 rapid prototyping platforms, such as Arduino, is relatively easy.

118

## 119 **Activity recognition method**

### 120 **Overview**

121 Our method is based on supervised machine learning, which can be divided into two main phases:  
122 training and testing. This approach assumes that sensor data that corresponds to the data collected  
123 by our low-energy sensors can be collected in advance during the training phase. During the  
124 training phase, the preexisting sensor data is labelled by biologists to indicate the target activities  
125 that should be captured by the loggers' cameras. This labeled sensor data is then used to train the  
126 activity recognition models that will be installed on the biologgers for camera control. The testing  
127 phase corresponds to the biologgers' use in the field, where the model built using the preexisting

128 data is used on board the loggers to recognize target activity in real time using data collected by the  
129 loggers' low energy sensors.

130

131 The supervised machine learning method used by our study uses decision trees, in which a  
132 hierarchy of simple rules is learned during the training phase that can be used to classify input data  
133 vectors during the testing phase based on thresholds learned from the training data. We start with  
134 the raw sensor data, which comes from our preexisting dataset in the training phase and from our  
135 low-energy sensors during the testing phase. We then divide this raw data into short windows (e.g.,  
136 1-second windows), from which we can extract several features from each window that will be used  
137 as input for the decision trees. Each window is then represented by a vector of extracted features,  
138 with labelled vectors extracted from preexisting data used to train the decision tree during the  
139 training phase and unlabeled vectors extracted in real time from low-energy sensors used as input to  
140 the tree during the testing phase. In our method, we build these decision trees using a modified  
141 version of the random forest algorithm in which we generate trees that minimize the amount of flash  
142 memory used for feature extraction on the logging device. The output of the decision tree classifier  
143 is then used to control the logger's video recording, allowing us to conserve the battery power of the  
144 logging device by limiting video recording to when we are most likely to capture the target activity.

145

#### 146 **Feature extraction**

147 In order to detect an activity of interest, we must first extract features from the raw data collected by  
148 our low-energy sensors. In this study, we extract these features from acceleration data and/or GPS  
149 coordinates. Fig. 2 (a) and (b) show examples of the GPS and accelerometer data collected by our  
150 device.

151

152 The GPS track in Fig. 2 (a) shows the movement of a single bird, with the animal's positions  
153 labeled as belonging to one of three different activity classes: *local search*, *global flight*, and  
154 *stationary*. The two inset boxes in Fig. 2 (a) show examples of the global flight and local search  
155 activities, along with examples of some features extracted from a 10-minute window of GPS data  
156 collected at a rate of one position per minute taken from each example. Comparing the two  
157 activities, we can see how such features can capture key differences between the activities. For  
158 example, the local search activity is conducted at a lower average speed with low displacement  
159 relative to the distance traveled when compared to the global flight activity.

160

161 Fig. 2 (b) shows an example of the accelerometer data collected by our device. The data is collected  
162 using a sampling rate of 25 Hz, with the net magnitude of acceleration computed for each 3-axis  
163 sample and stored in a 25-sample (1-second) buffer in RAM. The conversion from 3-axis data to  
164 magnitude values is illustrated in Fig. 2 (b), with the first row corresponding to the raw 3-axis data  
165 and the second row corresponding to the converted magnitude data. Features are then extracted  
166 from the 1-second windows of magnitude values, with Fig. 2 (c) listing some of the features used in  
167 our method. For the full list of features extracted from GPS and accelerometer data see Online  
168 Methods.

169

170 The acceleration data shown in the first row of Fig. 2 (b) includes three highlighted portions that  
171 correspond to the activities: *flying*, *foraging*, and *stationary*. The third row of Fig. 2 (b) shows the  
172 magnitude data for each activity, while the third and fourth rows show examples of the features that  
173 are extracted from 1-second windows of magnitude data in our method. Note that each horizontal  
174 segment in the stepped lines in the third and fourth rows correspond to the single value extracted for  
175 the 1-second window covered by the horizontal segment. Comparing the three activities, we can



176 again see how these features capture key characteristics of each activity allowing us to distinguish  
177 between the activities based on a few key values derived from each window of data.

178

## 179 **Classification**

180 Using the features extracted from the GPS or accelerometer data, we then construct a decision tree  
181 that can be used to classify each segment of data into an activity class. Fig. 2 (d) shows an example  
182 of such a tree that was constructed using Scikit-learn's decision tree algorithm (Pedregosa et al.  
183 2011) using the magnitude-based features shown in rows three and four of Fig. 2 (b). The white  
184 nodes in this tree show the rules used to classify each instance of data based on the features  
185 extracted from the sensor data, while the grey leaf nodes show the classes assigned based on those  
186 rules. Each leaf node also lists the support for each class at that node, with the three values listed  
187 (e.g., [10, 0, 0]) corresponding to the number of instances of training data classified at that node  
188 from the classes flying, foraging, and stationary, respectively. In this example the support values  
189 from all the leaf nodes sum to 30, which correspond to the 30 segments of training data taken from  
190 rows three and four of Fig. 2 (b).

191

192 When classifying a new 1-second window of data, we simply start at the root node of the tree and  
193 compute each feature encountered until we reach a leaf node that assigns the most likely class for  
194 the data. For example, consider the case where we need to classify one of the 10 1-second windows  
195 from the *Flying* portion of Fig 2 (b), i.e., the data shown in the left-most chart of each of rows two  
196 through four. Starting at the root node of the example decision tree in Fig. 2 (d), we see that the first  
197 rule used during classification checks the *crest* feature using a threshold of 0.69. Given that the  
198 *crest* values for our *Flying* data are all greater than 0.69, we would follow the *False* path from that  
199 node, immediately reaching a leaf node that assigns the *Flying* class to the data segment.

200

201 Looking at this example tree, we can also better understand two potential benefits of decision trees  
202 when used with MCUs. The first is their small size, which is due to how their logic can be  
203 implemented as a series of nested if-else statements. This allows their models to be stored using  
204 only a minimal amount of flash memory (as opposed to models generated by other techniques such  
205 as SVM which typically consume too much space for use on MCUs). The second is their potential  
206 for minimizing the energy used by the device during recognition. This comes from how each input  
207 data segment only follows a single path through the tree, meaning that the MCU needs only to  
208 extract features as they are encountered in the path taken through the tree, minimizing the feature  
209 extraction processes run for each input vector.

210

#### 211 **Feature costs**

212 Standard decision tree algorithms, e.g., Scikit-learn's default algorithm, build decision trees that  
213 maximize classification accuracy with no option to weight the features used in the tree based on a  
214 secondary factor such as memory usage. This can be an issue when running the classifier on an  
215 embedded device, where the total amount of flash memory available can be limited (e.g., 32 kB).  
216 Fig. 2 (e) shows an example of a decision tree built using Scikit-learn's default algorithm using a  
217 full dataset of acceleration data, which results in a total memory footprint of approximately 1958  
218 bytes. While this tree technically fits into our biollogger's limited flash memory, its large size  
219 reduces the memory available for other system functions needed to operate the logger's sensors and  
220 write sensor data to long-term storage.

221

222 The memory size of the tree in Fig. 2 (e) was estimated based on the feature sizes listed in Fig. 2  
223 (c), with the letters used to label each node in the tree indicating which feature from Fig. 2 (c) was

224 used at that node. While freely choosing a combination of several of these features results in an  
225 accurate decision tree, it may also be possible to achieve good results when using only a subset of  
226 these features. By restricting the use of the costliest features, e.g., kurtosis, it may be possible to  
227 reduce the size of the resulting tree while achieving similar accuracy.

228

### 229 **Reduced cost decision tree**

230 Given the need to minimize the size of the feature extraction functions used by decision trees when  
231 run on devices such as biologgers, this study proposes a method for automatically generating low-  
232 cost decision trees that is based on the *random forest* algorithm (Breiman, L. 2001). The random  
233 forest algorithm is a decision tree algorithm that generates multiple unique decision trees from a  
234 single dataset by restricting the features made available when creating each node in a tree to a  
235 randomly selected subset of the features. In the original random forest algorithm, several trees are  
236 generated in this way and are then combined for use as an ensemble classifier. Our method modifies  
237 the original algorithm by using weighted random selection of the features for each node, with each  
238 feature extraction function assigned a weight proportional to the inverse of its size. The resulting  
239 algorithm generates randomized trees that are less likely to incorporate features that require more  
240 space in flash memory while still attempting to maximize classification accuracy using the  
241 remaining features. We then select a single tree from among the several randomized trees generated  
242 for use on our device.

243

244 Fig. 2 (f) shows the process used when generating nodes in a decision tree using our method. We  
245 start by assigning each feature a weight that is proportional to the inverse of its weight. For  
246 example, *mean* uses only 40 bytes of flash memory and so is assigned a relatively high weight of  
247 0.35, while *kurtosis* uses 680 bytes of flash memory and so is assigned a weight of 0.02. We then

248 use these weights to perform weighted random selection (without replacement) of the features to  
249 select which features to use when creating a new node in the tree. In this example, we have  
250 randomly placed four dots along the perimeter of the pie chart, signifying a random selection of the  
251 features *mean*, *variance*, *mean-cross*, and *energy*. We then select the best candidate feature from  
252 amongst these randomly selected features, which in this example is *energy*. This feature is then used  
253 to create the next node in our decision tree, shown as the node “energy  $\leq 1.141$ ” on the right side  
254 of Fig. 2 (f).

255

256 Using our method for weighted random selection of nodes described above, we are then able to  
257 generate randomized trees that tend to use less costly features. When generating these trees, we can  
258 easily estimate the size of each tree generated based on the sum of sizes of all features used in the  
259 tree and can set a threshold size for which all trees above the threshold are discarded. Fig. 2 (g)  
260 shows an example batch of trees output by our method where we have set a threshold size of 1000  
261 bytes. These trees were generated from the same training and validation data as was used for Fig. 2  
262 (e). We can then select a single tree from among these trees that gives our desired balance of cost to  
263 accuracy. In this example, we have selected the tree illustrated in Fig. 2 (h) based on it having the  
264 highest accuracy among this batch of trees. Comparing Fig. 2 (h) to (e), we can see that our method  
265 was able to generate a tree that is 42 percent the size of (e) while maintaining close to the same  
266 accuracy.

267

### 268 **Other functionalities of our logger**

269 Our method also incorporates several functionalities that enable robust activity recognition in the  
270 conditions encountered during this study. First, we address the need for noise robustness, due to the  
271 varying amount of noise that can be introduced into the sensor data stemming from how the loggers

272 must be loosely attached to the birds via taping the logger to the birds' feathers. We achieve this  
273 through data augmentation during the training phase, in which we train our models on multiple  
274 versions of our training data that each are altered by adding varying levels of random artificial  
275 noise. Next we address the need for robustness to sensor positioning, which stems from how loggers  
276 can be attached to birds at different positions and orientations, such as some loggers having been  
277 placed on the birds' backs to maximize GPS reception while others were placed on the birds' chests  
278 to improve the camera's view of the animals' feeding. We achieve this by converting all 3-axis  
279 accelerometer data to net magnitude of acceleration values, removing the orientation information  
280 from the data before use in our activity recognition models. Finally, we address the need for  
281 robustness to differences in sensor hardware that stems from how the biologgers used in this study  
282 must be trained using accelerometer data collected from hardware used in previous years' research.  
283 We achieve this by running an online conversion of the sensor data collected on our biollogger to  
284 downsample our sensor's 16-bit resolution data to match the 8-bit resolution data collected in  
285 previous years prior to using the data in our activity recognition models. Further information about  
286 these functionalities can be found in the Online Methods.

287

### 288 **Performance of Proposed Method**

289 We evaluated the proposed method by using it to control the video recorded by the biologgers  
290 described in the section *Sensor data logger* when attached to black-tailed gulls from a breeding  
291 colony located on Kabushima Island at Hachinohe, Japan. Along with the proposed method, we also  
292 deployed one logger using a naive method, in which the logger was programmed to activate the  
293 camera in 15-minute intervals. All loggers (naive and proposed) ran the camera for a set 1-minute  
294 window after each activation. Altogether 11 loggers were used, with 10 loggers running the  
295 proposed method and 1 logger running the naive method. A total of 212 1-minute videos were

296 collected by the loggers, with 185 videos collected using the proposed method and 27 videos  
297 collected using the naive sampling method.  
298  
299 The proposed method was trained to activate the cameras during possible foraging activity, which  
300 we identified based on abnormal movements during flight that seemed to correspond to diving  
301 behavior. These abnormal movements were detected by extracting features from 1-second windows  
302 of acceleration data. Additionally, camera activation was limited to movements detected during  
303 flight activity by only activating the camera when the bird's movement had recently been classified  
304 as flying prior to being classified as foraging, i.e., flying had been detected within the previous five  
305 seconds. The acceleration data used to train the decision trees used in our method was collected in  
306 the previous year from birds at the same colony using Axy-trek logging devices<sup>1</sup>.

307  
308 Fig. 3 gives an overview of the results for the black-tailed gulls. Fig 3 (a) and (b) show GPS tracks  
309 that give an overview of the video data collected by the proposed method and the naive method,  
310 respectively. The portions of the tracks highlighted in green show where video data was collected  
311 on possible or confirmed foraging activity, while the sections highlighted in grey show where video  
312 was collected on non-foraging activity. While only one logger was run using the naive sampling  
313 strategy, its results highlight the issue with such a method, with the logger quickly depleting its  
314 battery recording videos on and around the nesting area, greatly reducing the range of collection  
315 when compared to the devices using event-based camera activation.

316

---

<sup>1</sup> <http://www.technosmart.eu/axytrek.php>

317 Fig. 3 (c) shows six examples of the acceleration data that was collected surrounding the time of  
318 camera activation by the proposed method, with each chart showing 10 seconds of net magnitude of  
319 acceleration data corresponding to a single example. The first row shows three examples of  
320 foraging and possible foraging activity, in which the camera was correctly activated based on the  
321 birds' movements, while the three examples in the second row show non-target (flying) activity in  
322 which the camera was incorrectly triggered. Note that the camera is activated based on a 1-second  
323 window of data, which corresponds to a window extracted from the area around the 2 to 4 second  
324 mark for each example. The exact timing is not known due to a short delay (about 3 to 4 seconds)  
325 between when the camera is triggered and when it starts recording data. As is shown in these charts,  
326 while acceleration data can be used to detect the target activity, it is difficult to avoid false positives  
327 due to the similarity between the target activity and other anomalous movements in the sensor data.  
328 Furthermore, due to the camera delay, it is not possible to film short actions that do not last longer  
329 than the camera delay or repeat within the 1-minute recording window. Some of the camera  
330 activations determined to be false positives in these results may have been such one-time actions  
331 that were not captured due to the delay.

332

333 The 212 videos collected by the biologists were evaluated by the biologists participating in this  
334 study, with each video classified as belonging to the classes: foraging, possible foraging, flying, and  
335 stationary. Of the 27 videos collected by the naive method, none contained any target activity, with  
336 3 videos containing flying activity and 24 videos containing stationary activity. In contrast, of the  
337 185 videos collected by the proposed method, 58 contained target activity (5 confirmed foraging  
338 and 53 possible foraging) and 127 contained non-target activity (86 flying and 41 stationary), giving  
339 the proposed method a precision of about 0.31. Of particular interest were five target activity videos

340 which captured images of the black-tailed gulls feeding on insects, both over land and over the sea.

341 **(Supplementary Videos 1 & 2)**

342

343 Along with the evaluation done by the biologists, we also analyzed the performance of the  
344 bilogger by first fully labelling the low-energy sensor data (i.e., accelerometer data) collected by  
345 the bi loggers and then computing the precision, recall, and f-measure for the 1-minute windows of  
346 sensor data that corresponded to the 212 videos collected by the logger. Based on this full labelling  
347 of the data, we computed the estimated distribution of the activities in the sensor data and found that  
348 the target activity (foraging) comprised only about 2 percent of the 6,616 total minutes of data  
349 collected, with 10 percent corresponding to flying activity and the remaining 88 percent  
350 corresponding to stationary. The proposed method achieved a precision of 0.27, a recall of 0.56, and  
351 an f-measure of 0.37 based on this full labelling. The naive method was again determined to have  
352 not collected any target activity, and so received a 0 for all three scores. Meanwhile, the proposed  
353 method was able to capture about half of the estimated windows of target activity (recall 0.56) and  
354 achieved a precision of 0.27, which is well above the expected precision of 0.02 for a naive  
355 sampling method when the target comprises only 2 percent of the dataset.

356

## 357 **DISCUSSION**

358 Several previous studies involving bi loggers have introduced trigger mechanisms that can be used  
359 to control when high-cost sensors are activated, with many of these studies focusing on controlling  
360 animal-borne cameras such as the one used in this study. (Troschianko et al. 2015) introduced a  
361 programmable animal-borne camera that incorporated an internal clock, allowing their camera to  
362 only be activated at set times of day. Both (Beringer et al. 2005) and (Goldbogen et al. 2017)  
363 incorporated light sensors to prevent their cameras from being triggered during periods of darkness.



364 (Boness et al. 2006) ensured that their camera only recorded the animal when it was at sea using a  
365 saltwater switch. (Watanuki et al. 2007) and (Volpov et al. 2015) took this a step farther by  
366 incorporating a depth sensor, allowing their cameras to only trigger when an animal surpassed a  
367 predefined depth threshold. (Nishiumi et al. 2018) deployed devices with two acceleration sensors,  
368 using a low-cost (low-frequency) acceleration sensor to activate a second high-cost (high-  
369 frequency) acceleration sensor when a preset threshold had been surpassed. Finally, (Brown et al.  
370 2012) measured the variance from their low-cost acceleration sensor to dynamically adjust the  
371 sampling rate of their high-cost GPS sensor based on predetermined threshold values. In each of  
372 these previous studies, the readings from the low-cost sensors were only compared to preset  
373 thresholds when determining whether to activate a high-cost sensor. Such methods are only suitable  
374 for coarse-level characterizations of behavior such as differentiating between underwater activity  
375 versus surface activity. In contrast, our proposed method can be used to distinguish between  
376 complex behaviors at a finer scale, allowing biologists to target a specific target behavior.

377

378 This is the first study to our knowledge to deploy AI in animal-borne data loggers. Wild animals  
379 represent one of the most extreme environments in which AI works in terms of limited space and  
380 harsh conditions. We anticipate our work will provide motivation for more widespread adoption of  
381 AI techniques on biologgers, both for intelligent sensor control and intelligent onboard data  
382 processing. Such techniques can not only be used to control what is collected by such devices, but  
383 also what is transmitted off the devices, such as is done by satellite relay tags (Cox et al. 2018). The  
384 combination of IoA (Internet of Animals) and AIoA (AI on animals) would enable biologists to  
385 answer a number of scientific questions about wild animals and obtain important information for  
386 their conservation.

387



389 FIGURES

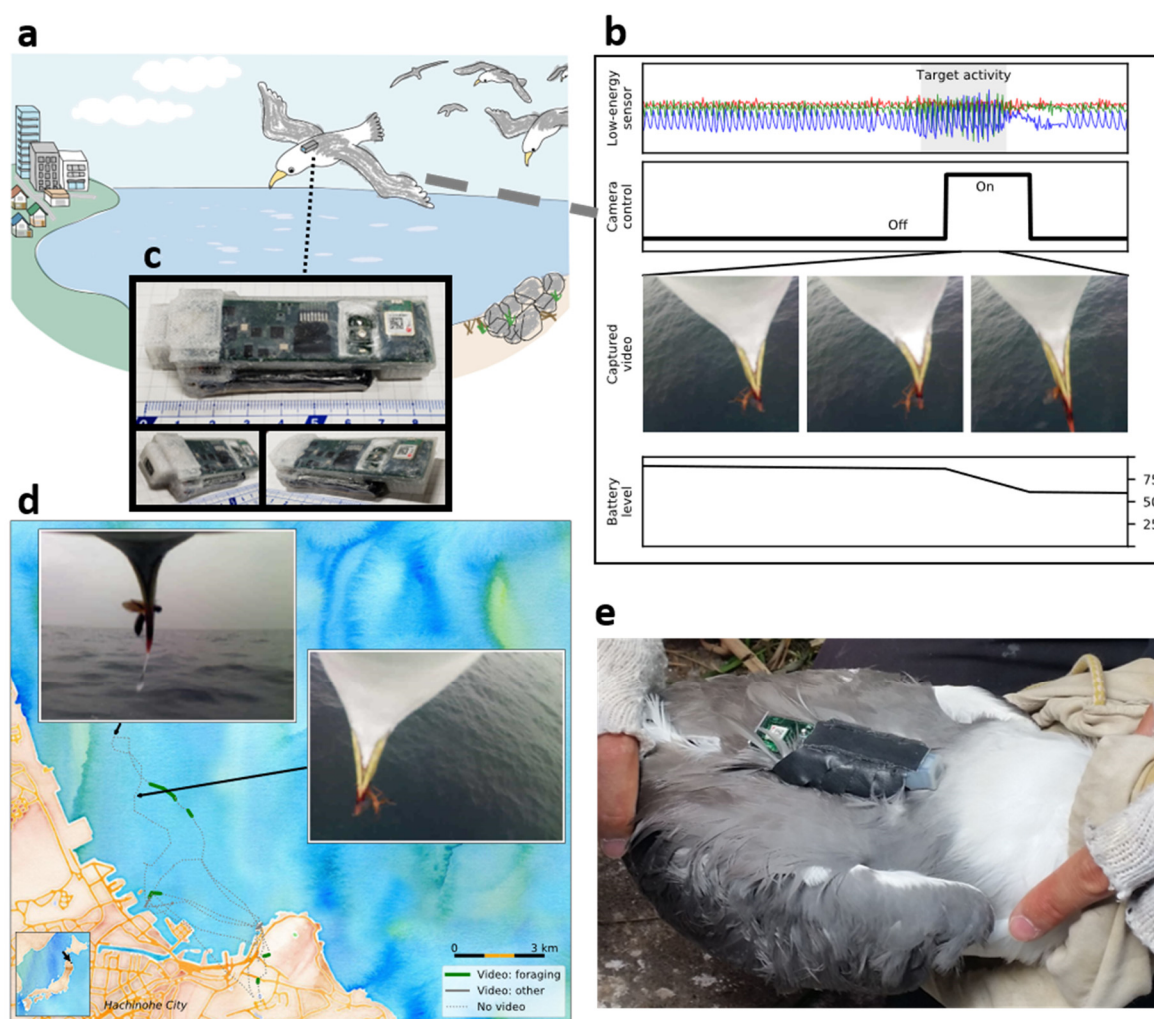

390

391 Figure 1. Biologging device used in this study. (a) Example deployment of biologger on a seabird in  
392 its natural environment. (b) Use of low-cost accelerometer to detect foraging activity and activate  
393 high-cost video camera for targeted collection. (c) Biologging device pictured with camera pointing  
394 to left, coated in waterproofing material for use on black-tailed gulls. Device measures 85 mm  
395 length x 35 mm width x 15 mm height and weighs approximately 27 g. (d) Example data collected  
396 by the biologging device from a single black-tailed gull from a colony near Hachinohe City, Japan.

397 Green highlighted portions of GPS track indicate successful video recording of foraging behavior

398 with inset images showing examples of insect predation captured by the device. (e) Attachment of

399 biologging device in the field to the back of a black-tailed gull using Tesa tape.

400

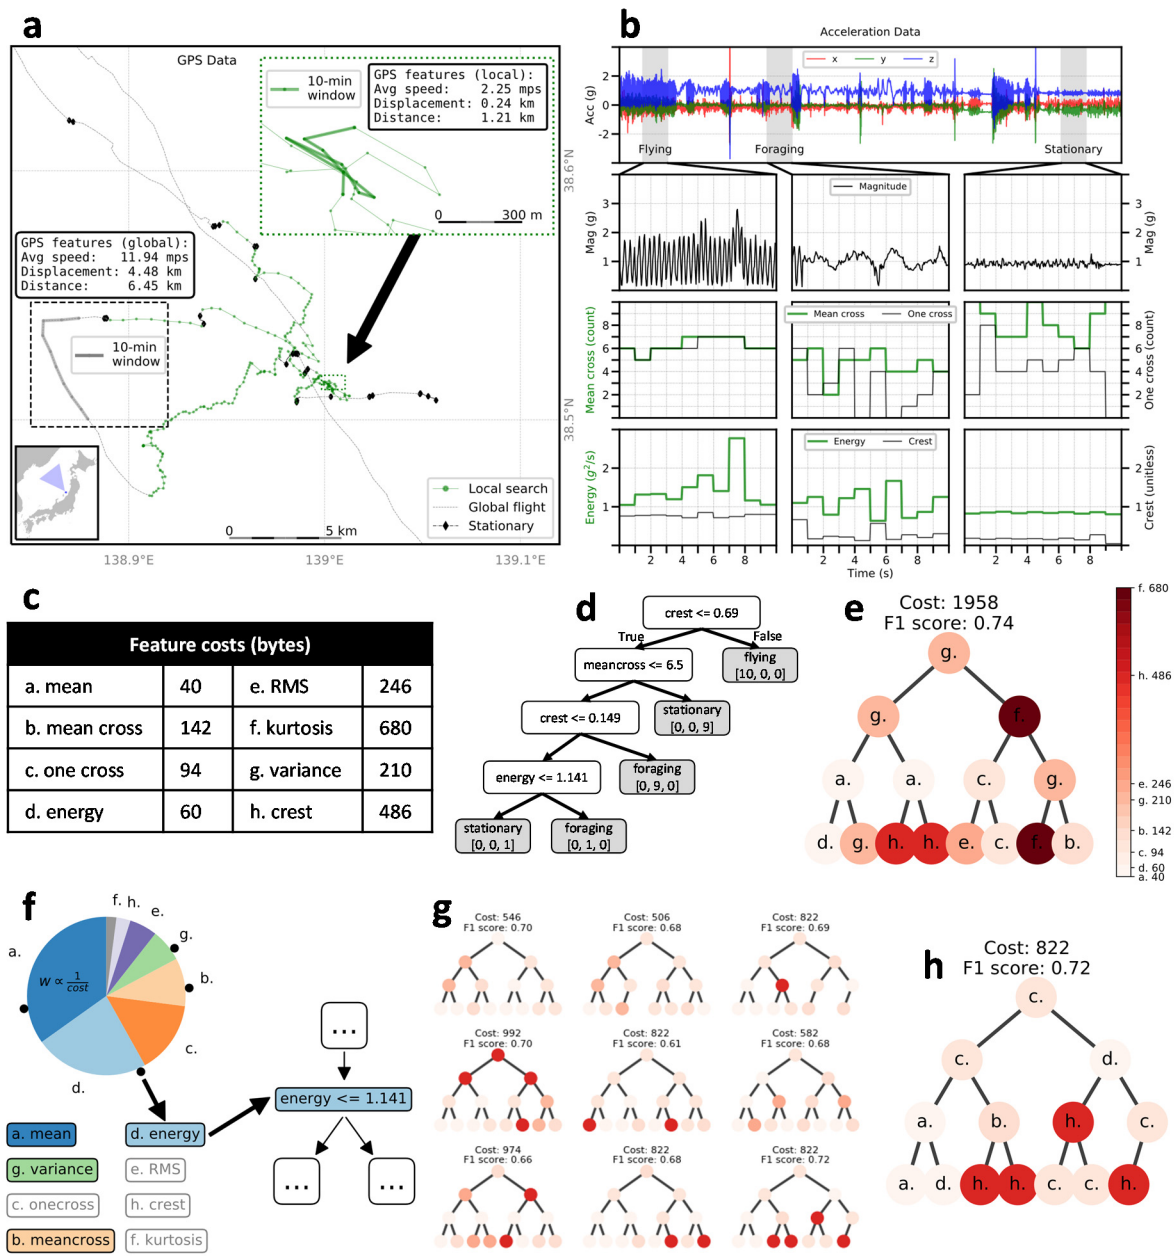

401

402 Figure 2. Creating AI models for sensor control onboard biologging devices. (a) Example GPS data

403 collected by our device, collected from a single streaked shearwater from a colony on Awashima

404 Island, Japan. The inset box on the left shows an example of global flight behavior, with example

405 feavgs extracted from a 10-min window of GPS data shown above. (b) Example accelerometer

406 data collected by our device, collected from a single black-tailed gull from a colony near Hachinohe  
407 City, Japan. The first row shows raw acceleration data, the second row shows magnitude of  
408 acceleration data from 10-sec windows of data corresponding to the behaviors flying, foraging, and  
409 stationary, respectively. The bottom two rows show four example features extracted from the  
410 magnitude of acceleration data for each 10-sec window. (c) The amount of program memory in  
411 bytes used to program each feature extraction function used for the decision tree. (d) Example  
412 decision tree generated from the 1-sec segments of feature values shown in the lower two rows of  
413 (b). Each white node represents a decision based on a single feature's value and each grey node  
414 represents a final predicted class for the current 1-sec segment of data. (e) Example decision tree  
415 generated by a standard decision tree algorithm. (f) Modified weighted sampling of features used in  
416 our method. Each feature is randomly selected proportionally to the inverse of their size. (g)  
417 Example output from our modified version of the random forest algorithm. Each tree is a candidate  
418 low-cost tree for use on a biologging device. (h) Possible final candidate selected from the trees in  
419 (g).  
420  
421

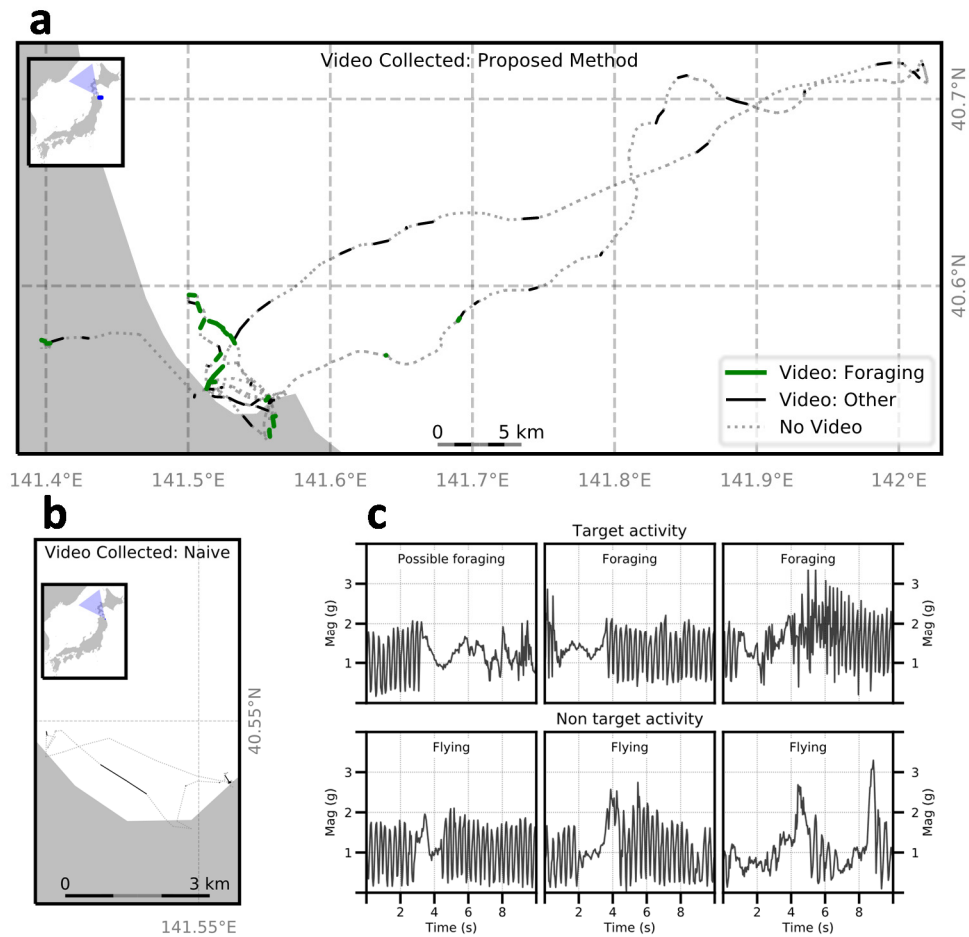

422

423 Figure 3. Results of AI video control for black-tailed gull. (a) GPS tracks collected by biologists

424 using the proposed method. Green highlighted sections represent successful video collection of

425 foraging behavior. Grey sections represent video collection of non-target behavior. (b) GPS tracks

426 collected by biographer using the naive method. (c) Examples of acceleration data (shown as

427 magnitude of acceleration) collected around the time of video camera activation on biologists using

428 the proposed method. Top row corresponds to videos containing target behavior while bottom row

429 corresponds to videos with non-target behavior.

430

431

432



433 **DATA COLLECTION**

434 The research at Awashima Island was conducted with permits from the Ministry of the  
435 Environment, Japan. The protocols at Kabushima Island were approved by the Agency for Cultural  
436 Affairs, Japan and the Aomori Prefectural Government. All field protocols were approved by the  
437 Animal Experimental Committee of Nagoya University.

438

439 **ACKNOWLEDGEMENTS**

440 We thank Rory P. Wilson, Yasue Kishino, and Kazuya Murao for suggestions and comments on  
441 this work. This work was supported by JSPS Kakenhi JP16H06536, JP16H06539, and  
442 JP16H06541.

443

444 **AUTHOR CONTRIBUTIONS**

445 J.M.K. performed method design, software implementation, data collection, data analysis, and  
446 manuscript writing. H.S., S.M., and Y.M. performed data collection and data analysis. M.S.  
447 performed software implementation and data collection. T.M. conceived and directed the study, and  
448 performed method design, data collection, data analysis, and manuscript writing. J.N. performed  
449 hardware design. K.Y. performed data collection, data analysis, and manuscript writing.

450 **REFERENCES**

451 Hussey, N. E. et al. Aquatic animal telemetry: a panoramic window into the underwater world.  
452 *Science* **348**, 1255642 (2015).

453 Kays, R., Crofoot, M. C., Jetz, W. & Wikelski, M. Terrestrial animal tracking as an eye on life and  
454 planet. *Science* **348**, aaa2478 (2015).

455 Watanuki, Y., Takahashi, A., Daunt, F. & Wanless, S. Underwater images from bird-borne cameras  
456 provide clue to poor breeding success of shags in 2005. *British Birds* **100.8**, 466–470 (2007).

- 457 Volpov, B. L., Hoskins, A. J., Battaile, B. C. & Viviant, M. Identification of prey captures in  
458 australian fur seals (*Arctocephalus pusillus doriferus*) using head-mounted accelerometers:  
459 field validation with animal-borne video cameras. *PLoS One* **10.6**, 1–19 (2015).  
460 doi:10.1371/journal.pone.0128789
- 461 Nishiumi, N., Matsuo, A., Kawabe, R., Payne, N. & Huveneers, C. A miniaturized threshold-  
462 triggered acceleration data-logger for recording burst movements of aquatic animals. *Journal of*  
463 *Experimental Biology* **221.6**, (2018). doi:10.1242/jeb.172346
- 464 Brown, D. D., et al. Accelerometer-informed GPS telemetry: reducing the trade-off between  
465 resolution and longevity. *Wildlife Society Bulletin* **36.1**, 139–146 (2012).
- 466 Rutz, C., et al. Video cameras on wild birds. *Science* **318.5851**, 765 (2007).
- 467 Moll, R. J., et al. A new ‘view’ of ecology and conservation through animal-borne video systems.  
468 *Trends in Ecology & Evolution* **22.12**, 660–668 (2007).
- 469 Gómez-Laich et al. Selfies of imperial cormorants (*Phalacrocorax atriceps*): What is happening  
470 underwater?. *PloS One* **10.9**, e0136980 (2015). doi:10.1371/journal.pone.0136980
- 471 Cox, S. L. et al. Processing of acceleration and dive data on-board satellite relay tags to investigate  
472 diving and foraging behaviour in free-ranging marine predators. *Methods in Ecology and*  
473 *Evolution* **9.1**, 64–77 (2018).
- 474 Kooyman, G. L. Techniques used in measuring diving capacities of Weddell seals. *Polar Record*  
475 **12.79**, 391-394 (1965).
- 476 Pedregosa, F., et al. Scikit-learn: machine learning in python. *Journal of Machine Learning*  
477 *Research* **12**, 2825-2830 (2011).
- 478 Breiman, L. Random forests. *Machine Learning*, **45.1**, 5-32 (2001).
- 479 Troscianko, J., Rutz, C. & Rutz, C. Activity profiles and hook-tool use of new caledonian crows  
480 recorded by bird-borne video cameras. *Biology Letters* **11.12** (2015).

- 481 Beringer, J., Millsbaugh, J. J., Sartwell, J. & Woeck, R. Real-time video recording of food selection  
482 by captive white-tailed deer. *Wildlife Society Bulletin* **32**, 648–654 (2005).
- 483 Goldbogen, J. A., Cade, D. E., Boersma, A. T. & Calambokidis, J. Using digital tags with integrated  
484 video and inertial sensors to study moving morphology and associated function in large aquatic  
485 vertebrates. *The Anatomical Record* **300.11**, 1935–1941 (2017).
- 486 Boness, D. J., Bowen, W. D., Buhleier, B. M. & Marshall, G. J. Mating tactics and mating system  
487 of an aquatic-mating pinniped: the harbor seal, *Phoca vitulina*. *Behavioral Ecology and*  
488 *Sociobiology* **61.1**, 119–130 (2006).
